# Supplementary material for: Healthcare Professionals Promotion of Physical Activity with Older Adults: A Survey of Knowledge and Routine Practice
Source: Int J Environ Res Public Health. 2021 Jun 4;18(11):6064. doi: 10.3390/ijerph18116064 (PMC8200063; doi:10.3390/ijerph18116064)
Supplement: Supplementary file 1 [file ijerph-18-06064-s001.zip › ijerph-1205949-supplementary.pdf]

**Table S1.** Theoretical domains of healthcare professional's behaviour in assessment, discussion, and prescription of physical activity in routine practice

| Theoretical Domains                              | Survey Question                                                                                                                                          | Answer                     | All respondents |      | General practitioner |      | Physiotherapist |      | Occupational therapist |      | Nursing |      |
|--------------------------------------------------|----------------------------------------------------------------------------------------------------------------------------------------------------------|----------------------------|-----------------|------|----------------------|------|-----------------|------|------------------------|------|---------|------|
|                                                  |                                                                                                                                                          |                            | N               | %    | N                    | %    | N               | %    | N                      | %    | N       | %    |
| Assessment of patient's physical activity levels |                                                                                                                                                          |                            |                 |      |                      |      |                 |      |                        |      |         |      |
| Social/Professional role and Identity            | As a part of routine practice, do you formally assess whether a patient is active or inactive (i.e., do you use any physical activity screening tools?)* | Always                     | 47              | 13.5 | 2                    | 5.6  | 34              | 20.0 | 34                     | 20.0 | 4       | 10.5 |
|                                                  |                                                                                                                                                          | Usually                    | 47              | 13.5 | 4                    | 11.1 | 31              | 18.2 | 31                     | 18.2 | 1       | 2.6  |
|                                                  |                                                                                                                                                          | Sometimes                  | 45              | 13.0 | 3                    | 8.3  | 23              | 13.5 | 23                     | 13.5 | 6       | 15.8 |
|                                                  |                                                                                                                                                          | Never                      | 169             | 48.7 | 21                   | 58.3 | 61              | 35.9 | 63                     | 61.2 | 24      | 63.2 |
|                                                  |                                                                                                                                                          | Not Stated                 | 39              | 11.2 | 6                    | 16.7 | 21              | 12.4 | 9                      | 8.7  | 3       | 7.9  |
| Discussing physical activity with patients       |                                                                                                                                                          |                            |                 |      |                      |      |                 |      |                        |      |         |      |
| Social/Professional role and Identity            | As a part of routine practice, do you initiate conversations with patients about physical activity?**                                                    | Always                     | 144             | 41.5 | 5                    | 13.9 | 99              | 58.2 | 28                     | 27.2 | 12      | 31.6 |
|                                                  |                                                                                                                                                          | Usually                    | 113             | 32.6 | 17                   | 47.2 | 43              | 25.3 | 38                     | 36.9 | 15      | 39.5 |
|                                                  |                                                                                                                                                          | Sometimes                  | 51              | 14.7 | 8                    | 22.2 | 7               | 18.4 | 27                     | 26.2 | 9       | 5.3  |
|                                                  |                                                                                                                                                          | Never                      | 2               | 0.6  |                      |      |                 |      | 1                      | 1.0  | 1       | 2.6  |
|                                                  |                                                                                                                                                          | Not Stated                 | 37              | 10.7 | 6                    | 16.7 | 19              | 11.2 | 9                      | 8.7  | 3       | 7.9  |
| Skills                                           | I have received suitable training to initiate conversations with patients about physical activity                                                        | Agree                      | 104             | 30.0 | 5                    | 13.9 | 75              | 44.1 | 18                     | 17.5 | 6       | 15.8 |
|                                                  |                                                                                                                                                          | Somewhat agree             | 79              | 22.8 |                      |      | 45              | 26.5 | 23                     | 22.3 | 11      | 28.9 |
|                                                  |                                                                                                                                                          | Neither agree nor disagree | 42              | 12.1 | 9                    | 25.0 | 13              | 7.6  | 11                     | 10.7 | 9       | 23.7 |

|                                       |                                                                                                                                      |                            |     |      |    |      |     |      |    |      |    |      |
|---------------------------------------|--------------------------------------------------------------------------------------------------------------------------------------|----------------------------|-----|------|----|------|-----|------|----|------|----|------|
| Social/Professional role and Identity | Discussing physical activity with patients is part of my work as a healthcare professional                                           | Somewhat disagree          | 34  | 9.8  | 3  | 8.3  | 11  | 6.5  | 19 | 18.4 | 1  | 2.6  |
|                                       |                                                                                                                                      | Disagree                   | 50  | 14.4 | 13 | 36.1 | 6   | 3.5  | 22 | 21.4 | 9  | 23.7 |
|                                       |                                                                                                                                      | Not stated                 | 38  | 11.0 | 6  | 16.7 | 20  | 11.8 | 10 | 9.7  | 2  | 5.3  |
|                                       |                                                                                                                                      | Agree                      | 244 | 70.3 | 23 | 63.9 | 139 | 81.8 | 58 | 56.3 | 24 | 63.2 |
|                                       |                                                                                                                                      | Somewhat agree             | 51  | 14.7 | 5  | 13.9 | 10  | 5.9  | 30 | 29.1 | 6  | 15.8 |
|                                       |                                                                                                                                      | Neither agree nor disagree | 10  | 2.9  | 1  | 2.8  | 2   | 1.2  | 3  | 2.9  | 4  | 10.5 |
|                                       |                                                                                                                                      | Somewhat disagree          | 4   | 1.2  |    |      |     |      | 3  | 2.9  | 1  | 2.6  |
|                                       |                                                                                                                                      | Disagree                   | 1   | 0.3  | 1  | 2.8  |     |      |    |      |    |      |
|                                       |                                                                                                                                      | Not stated                 | 37  | 10.7 | 6  | 16.7 | 19  | 11.2 | 9  | 8.7  | 3  | 7.9  |
| Memory, Attention, Decision Processes | Discussing physical activity with patients is easy to remember to do                                                                 | Agree                      | 164 | 47.3 | 6  | 16.7 | 105 | 61.8 | 36 | 35.0 | 17 | 44.7 |
|                                       |                                                                                                                                      | Somewhat agree             | 93  | 26.8 | 13 | 36.1 | 36  | 35.0 | 36 | 35.0 | 13 | 34.2 |
|                                       |                                                                                                                                      | Neither agree nor disagree | 25  | 7.2  | 5  | 13.9 | 9   | 8.7  | 9  | 8.7  | 2  | 5.3  |
|                                       |                                                                                                                                      | Somewhat disagree          | 24  | 6.9  | 4  | 11.1 | 5   | 2.9  | 11 | 10.7 | 4  | 10.5 |
|                                       |                                                                                                                                      | Disagree                   | 4   | 1.2  | 2  | 5.6  |     |      | 2  | 1.9  |    |      |
|                                       |                                                                                                                                      | Not stated                 | 37  | 10.7 | 6  | 16.7 | 20  | 11.8 | 9  | 8.7  | 2  | 5.3  |
|                                       |                                                                                                                                      | Agree                      | 123 | 35.4 | 8  | 22.2 | 78  | 45.9 | 27 | 26.2 | 10 | 26.3 |
| Belief about capabilities             | I am confident that I can discuss physical activity as part of routine practice with patients even when the patient is not motivated | Somewhat agree             | 127 | 36.6 | 14 | 38.9 | 59  | 34.7 | 36 | 35.0 | 18 | 47.4 |
|                                       |                                                                                                                                      | Neither agree nor disagree | 29  | 8.4  | 3  | 8.3  | 6   | 3.5  | 15 | 14.6 | 5  | 13.2 |
|                                       |                                                                                                                                      | Somewhat disagree          | 22  | 6.3  | 3  | 8.3  | 5   | 2.9  | 11 | 10.7 | 3  | 7.9  |
|                                       |                                                                                                                                      | Disagree                   | 1   | 0.3  | 1  | 2.8  |     |      |    |      |    |      |

|                                                |                                                                                                                              |                            |     |      |    |      |     |      |    |      |    |      |
|------------------------------------------------|------------------------------------------------------------------------------------------------------------------------------|----------------------------|-----|------|----|------|-----|------|----|------|----|------|
| Belief about capabilities                      | I am confident that I can discuss physical activity as part of routine practice with patients even when there is little time | Disagree                   | 9   | 2.6  | 1  | 2.8  | 3   | 1.8  | 5  | 4.9  |    |      |
|                                                |                                                                                                                              | Not stated                 | 37  | 10.7 | 7  | 19.4 | 19  | 11.2 | 9  | 8.7  | 2  | 5.3  |
|                                                |                                                                                                                              | Agree                      | 102 | 29.4 | 2  | 5.6  | 69  | 40.6 | 19 | 18.4 | 12 | 31.6 |
|                                                |                                                                                                                              | Somewhat agree             | 119 | 34.4 | 11 | 30.6 | 54  | 31.8 | 39 | 37.9 | 15 | 39.5 |
|                                                |                                                                                                                              | Neither agree nor disagree | 33  | 9.5  | 7  | 19.4 | 12  | 7.1  | 12 | 11.7 | 2  | 5.3  |
|                                                |                                                                                                                              | Somewhat disagree          | 42  | 12.1 | 9  | 25.0 | 13  | 7.6  | 16 | 15.5 | 4  | 10.5 |
|                                                |                                                                                                                              | Disagree                   | 14  | 4.0  | 1  | 2.8  | 3   | 1.8  | 8  | 7.8  | 2  | 5.3  |
|                                                |                                                                                                                              | Not stated                 | 37  | 10.7 | 6  | 16.7 | 19  | 11.2 | 9  | 8.7  | 3  | 7.9  |
| Discussing physical activity with older adults |                                                                                                                              |                            |     |      |    |      |     |      |    |      |    |      |
| Knowledge                                      | I am aware of how to initiate conversations about physical activity with older adults as a part of routine care              | Agree                      | 202 | 58.2 | 14 | 38.9 | 117 | 68.8 | 49 | 47.6 | 22 | 57.9 |
|                                                |                                                                                                                              | Somewhat agree             | 88  | 25.4 | 12 | 33.3 | 30  | 17.6 | 32 | 31.1 | 14 | 36.8 |
|                                                |                                                                                                                              | Neither agree nor disagree | 11  | 3.2  | 3  | 8.3  |     |      | 8  | 7.8  |    |      |
|                                                |                                                                                                                              | Somewhat disagree          | 5   | 1.4  | 1  | 2.8  | 2   | 1.2  | 2  | 1.9  |    |      |
|                                                |                                                                                                                              | Disagree                   | 3   | 0.9  | 12 | 33.3 |     |      | 3  | 2.9  |    |      |
|                                                |                                                                                                                              | Not stated                 | 38  | 11.0 | 6  | 16.7 | 21  | 12.4 | 9  | 8.7  | 2  | 5.3  |
| Skills                                         | I have the skills to initiate conversations with older adults about physical activity                                        | Agree                      | 187 | 53.9 | 12 | 33.3 | 112 | 65.9 | 47 | 45.6 | 16 | 42.1 |
|                                                |                                                                                                                              | Somewhat agree             | 91  | 26.2 | 13 | 36.1 | 30  | 17.6 | 34 | 33.0 | 14 | 36.8 |
|                                                |                                                                                                                              | Neither agree nor disagree | 20  | 5.8  | 2  | 5.6  | 7   | 4.1  | 6  | 5.8  | 5  | 13.2 |
|                                                |                                                                                                                              | Somewhat disagree          | 10  | 2.9  | 2  | 5.6  | 2   | 1.2  | 5  | 4.9  | 1  | 2.6  |
|                                                |                                                                                                                              | Disagree                   | 3   | 0.9  | 1  | 2.8  |     |      | 2  | 1.9  |    |      |

|                                                       |                                                                                                                        |                                   |     |      |    |      |     |      |     |      |    |      |
|-------------------------------------------------------|------------------------------------------------------------------------------------------------------------------------|-----------------------------------|-----|------|----|------|-----|------|-----|------|----|------|
|                                                       |                                                                                                                        | <b>Not stated</b>                 | 36  | 10.4 | 6  | 16.7 | 19  | 11.2 | 9   | 8.7  | 2  | 5.3  |
| <b>Social/<br/>Professional role and<br/>Identity</b> | As a healthcare professional it is my job to discuss physical activity with older adults                               | <b>Agree</b>                      | 236 | 68.0 | 23 | 63.9 | 130 | 76.5 | 55  | 53.4 | 28 | 73.7 |
|                                                       |                                                                                                                        | <b>Somewhat agree</b>             | 55  | 15.9 | 3  | 8.3  | 16  | 9.4  | 29  | 28.2 | 7  | 18.4 |
|                                                       |                                                                                                                        | <b>Neither agree nor disagree</b> | 10  | 2.9  | 1  | 2.8  | 1   | 0.6  | 7   | 6.8  | 1  | 2.6  |
|                                                       |                                                                                                                        | <b>Somewhat disagree</b>          | 4   | 1.2  | 1  | 2.8  |     |      | 3   | 2.9  |    |      |
|                                                       |                                                                                                                        | <b>Disagree</b>                   | 1   | 0.3  | 1  | 2.8  |     |      |     |      |    |      |
|                                                       |                                                                                                                        | <b>Not stated</b>                 | 41  | 11.8 | 7  | 19.4 | 23  | 13.5 | 9   | 8.7  | 2  | 5.3  |
| <b>Belief about consequences</b>                      | For me, discussing physical activity with an older adult in routine practice is useful                                 | <b>Agree</b>                      | 193 | 55.6 | 15 | 41.7 | 115 | 67.6 | 44  | 42.7 | 19 | 50.0 |
|                                                       |                                                                                                                        | <b>Somewhat agree</b>             | 93  | 26.8 | 12 | 33.3 | 31  | 18.2 | 38  | 36.9 | 12 | 31.6 |
|                                                       |                                                                                                                        | <b>Neither agree nor disagree</b> | 14  | 4.0  | 1  | 2.8  | 3   | 1.8  | 7   | 6.8  | 3  | 7.9  |
|                                                       |                                                                                                                        | <b>Somewhat disagree</b>          | 5   | 1.4  | 1  | 2.8  | 1   | 0.6  | 2   | 1.9  | 1  | 2.6  |
|                                                       |                                                                                                                        | <b>Disagree</b>                   | 2   | 0.6  | 1  | 2.8  |     |      | 1   | 1.0  |    |      |
|                                                       |                                                                                                                        | <b>Not stated</b>                 | 40  | 11.5 | 6  | 16.7 | 20  | 11.8 | 11  | 10.7 | 3  | 7.9  |
| <b>Intentions</b>                                     | I intend to discuss physical activity in the next consultation/appointment with an older adult as part of routine care | <b>Agree</b>                      | 191 | 55.0 | 10 | 27.8 | 43  | 41.7 | 117 | 68.8 | 21 | 55.3 |
|                                                       |                                                                                                                        | <b>Somewhat agree</b>             | 68  | 19.6 | 10 | 27.8 | 25  | 24.3 | 24  | 14.1 | 9  | 23.7 |
|                                                       |                                                                                                                        | <b>Neither agree nor disagree</b> | 35  | 10.1 | 6  | 16.7 | 17  | 16.5 | 8   | 4.7  | 4  | 10.5 |
|                                                       |                                                                                                                        | <b>Somewhat disagree</b>          | 11  | 3.2  | 2  | 5.6  | 7   | 6.8  | 1   | 0.6  | 1  | 2.6  |
|                                                       |                                                                                                                        | <b>Disagree</b>                   | 5   | 1.4  | 2  | 5.6  | 2   | 1.9  |     |      | 1  | 2.6  |

|                        |                                                                                                                       | Not stated                 | 37  | 10.7 | 6  | 16.7 | 9   | 8.7  | 20 | 11.8 | 2  | 5.3  |
|------------------------|-----------------------------------------------------------------------------------------------------------------------|----------------------------|-----|------|----|------|-----|------|----|------|----|------|
| Environmental context  | In the organisation that I work in, discussing physical activity with older patients is something that I typically do | Agree                      | 170 | 49.0 | 6  | 16.7 | 114 | 67.1 | 34 | 33.0 | 16 | 42.1 |
|                        |                                                                                                                       | Somewhat agree             | 80  | 23.1 | 11 | 30.6 | 27  | 15.9 | 29 | 28.2 | 13 | 34.2 |
|                        |                                                                                                                       | Neither agree nor disagree | 29  | 8.4  | 7  | 19.4 | 8   | 4.7  | 12 | 11.7 | 2  | 5.3  |
|                        |                                                                                                                       | Somewhat disagree          | 22  | 6.3  | 5  | 13.9 | 2   | 1.2  | 11 | 10.7 | 4  | 10.5 |
|                        |                                                                                                                       | Disagree                   | 9   | 2.6  |    |      |     |      | 8  | 7.8  | 1  | 2.6  |
|                        |                                                                                                                       | Not stated                 | 37  | 10.7 | 7  | 19.4 | 19  | 11.2 | 9  | 8.7  | 2  | 5.3  |
| Behavioural regulation | Discussing physical activity in routine practice with older adults is something I do automatically                    | Agree                      | 133 | 38.8 | 4  | 11.1 | 97  | 57.1 | 23 | 22.3 | 9  | 23.7 |
|                        |                                                                                                                       | Somewhat agree             | 100 | 28.8 | 12 | 33.3 | 34  | 20.0 | 33 | 32.0 | 21 | 55.3 |
|                        |                                                                                                                       | Neither agree nor disagree | 32  | 9.2  | 8  | 22.2 | 11  | 6.5  | 11 | 10.7 | 2  | 5.3  |
|                        |                                                                                                                       | Somewhat disagree          | 31  | 8.9  | 3  | 8.3  | 8   | 4.7  | 17 | 16.5 | 3  | 7.9  |
|                        |                                                                                                                       | Disagree                   | 14  | 4.0  | 3  | 8.3  | 1   | 0.6  | 9  | 8.7  | 1  | 2.6  |
|                        |                                                                                                                       | Not stated                 | 37  | 10.7 | 6  | 16.7 | 19  | 11.2 | 10 | 9.7  | 2  | 5.3  |
| Behavioural regulation | I have a clear plan of how I will initiate discussions about physical activity in routine practice with older adults  | Agree                      | 106 | 30.5 | 4  | 11.1 | 77  | 45.3 | 19 | 18.4 | 6  | 15.8 |
|                        |                                                                                                                       | Somewhat agree             | 92  | 26.5 | 7  | 19.4 | 44  | 25.9 | 27 | 26.2 | 14 | 36.8 |
|                        |                                                                                                                       | Neither agree nor disagree | 52  | 15.0 | 7  | 19.4 | 18  | 10.6 | 19 | 18.4 | 8  | 21.1 |
|                        |                                                                                                                       | Somewhat disagree          | 46  | 13.3 | 8  | 22.2 | 11  | 6.5  | 21 | 20.4 | 6  | 15.8 |
|                        |                                                                                                                       | Disagree                   | 14  | 4.0  | 4  | 11.1 | 1   | 0.6  | 7  | 6.8  | 2  | 5.3  |

|                                                                           |                                                                                                                                                                                  |                                   |     |      |    |      |     |      |    |      |    |      |
|---------------------------------------------------------------------------|----------------------------------------------------------------------------------------------------------------------------------------------------------------------------------|-----------------------------------|-----|------|----|------|-----|------|----|------|----|------|
|                                                                           |                                                                                                                                                                                  | <b>Not stated</b>                 | 37  | 10.7 | 6  | 16.7 | 19  | 11.2 | 10 | 9.7  | 2  | 5.3  |
| <b>Use of physical activity guidelines, prescription, and signposting</b> |                                                                                                                                                                                  |                                   |     |      |    |      |     |      |    |      |    |      |
| <b>Environmental context</b>                                              | Physical activity guidelines have a place in routine practice                                                                                                                    | <b>Agree</b>                      | 224 | 64.6 | 18 | 50.0 | 117 | 68.8 | 61 | 59.2 | 28 | 73.7 |
|                                                                           |                                                                                                                                                                                  | <b>Somewhat agree</b>             | 64  | 18.4 | 9  | 25.0 | 25  | 14.7 | 23 | 22.3 | 7  | 18.4 |
|                                                                           |                                                                                                                                                                                  | <b>Neither agree nor disagree</b> | 16  | 4.6  | 2  | 5.6  | 5   | 2.9  | 8  | 7.8  | 1  | 2.6  |
|                                                                           |                                                                                                                                                                                  | <b>Somewhat disagree</b>          | 4   | 1.2  |    |      | 2   | 1.2  | 2  | 1.9  |    |      |
|                                                                           |                                                                                                                                                                                  | <b>Disagree</b>                   | 1   | 0.3  | 1  | 2.8  |     |      |    |      |    |      |
|                                                                           |                                                                                                                                                                                  | <b>Not stated</b>                 | 38  | 11.0 | 6  | 16.7 | 21  | 12.4 | 9  | 8.7  | 2  | 5.3  |
|                                                                           |                                                                                                                                                                                  |                                   |     |      |    |      |     |      |    |      |    |      |
| <b>Environmental context</b>                                              | There is sufficient time allocated in day-to-day work (routine practice) to implement physical activity guidelines for adults/older adults                                       | <b>Agree</b>                      | 68  | 19.6 | 2  | 5.6  | 45  | 26.5 | 15 | 14.6 | 6  | 15.8 |
|                                                                           |                                                                                                                                                                                  | <b>Somewhat agree</b>             | 91  | 26.2 | 3  | 8.3  | 55  | 32.4 | 23 | 22.3 | 10 | 26.3 |
|                                                                           |                                                                                                                                                                                  | <b>Neither agree nor disagree</b> | 50  | 14.4 | 6  | 16.7 | 19  | 11.2 | 18 | 17.5 | 7  | 18.4 |
|                                                                           |                                                                                                                                                                                  | <b>Somewhat disagree</b>          | 68  | 19.6 | 8  | 22.2 | 25  | 14.7 | 26 | 25.2 | 9  | 23.7 |
|                                                                           |                                                                                                                                                                                  | <b>Disagree</b>                   | 33  | 9.5  | 11 | 30.6 | 7   | 4.1  | 11 | 10.7 | 4  | 10.5 |
|                                                                           |                                                                                                                                                                                  | <b>Not stated</b>                 | 37  | 10.7 | 6  | 16.7 | 19  | 11.2 | 10 | 9.7  | 2  | 5.3  |
|                                                                           |                                                                                                                                                                                  |                                   |     |      |    |      |     |      |    |      |    |      |
| <b>Social/Professional role and Identity</b>                              | As a part of routine practice, do you signpost patients to other physical activity services (i.e., exercise referral programmes/community-based physical activity initiatives?)* | <b>Always</b>                     | 42  | 12.1 | 1  | 2.8  | 30  | 17.6 | 5  | 4.9  | 6  | 15.8 |
|                                                                           |                                                                                                                                                                                  | <b>Usually</b>                    | 84  | 24.2 | 2  | 5.6  | 53  | 31.2 | 23 | 22.3 | 6  | 15.8 |
|                                                                           |                                                                                                                                                                                  | <b>Sometimes</b>                  | 131 | 37.8 | 20 | 55.6 | 56  | 32.9 | 42 | 40.8 | 13 | 34.2 |
|                                                                           |                                                                                                                                                                                  | <b>Never</b>                      | 53  | 15.3 | 6  | 16.7 | 12  | 7.1  | 24 | 23.3 | 11 | 28.9 |
|                                                                           |                                                                                                                                                                                  | <b>Not Stated</b>                 | 37  | 10.7 | 7  | 19.4 | 19  | 11.2 | 9  | 8.7  | 2  | 5.3  |

|                                  |                                                                                                                                            |                                   |     |      |    |      |     |      |    |      |    |      |
|----------------------------------|--------------------------------------------------------------------------------------------------------------------------------------------|-----------------------------------|-----|------|----|------|-----|------|----|------|----|------|
| <b>Social influence</b>          | I am supported to use physical activity discussions/ assessment/ prescription in everyday practice                                         | <b>Agree</b>                      | 99  | 28.5 | 1  | 2.8  | 66  | 38.8 | 24 | 23.3 | 8  | 21.1 |
|                                  |                                                                                                                                            | <b>Somewhat agree</b>             | 83  | 23.9 | 2  | 5.6  | 53  | 31.2 | 18 | 17.5 | 10 | 26.3 |
|                                  |                                                                                                                                            | <b>Neither agree nor disagree</b> | 63  | 18.2 | 10 | 27.8 | 19  | 11.2 | 22 | 21.4 | 12 | 31.6 |
|                                  |                                                                                                                                            | <b>Somewhat disagree</b>          | 44  | 12.7 | 7  | 19.4 | 9   | 5.3  | 22 | 21.4 | 6  | 15.8 |
|                                  |                                                                                                                                            | <b>Disagree</b>                   | 21  | 6.1  | 10 | 27.8 | 3   | 1.8  | 8  | 7.8  |    |      |
|                                  |                                                                                                                                            | <b>Not stated</b>                 | 37  | 10.7 | 6  | 16.7 | 20  | 11.8 | 9  | 8.7  | 2  | 5.3  |
| <b>Belief about consequences</b> | If I assess/ discuss/ prescribe physical activity with an older adult as part of routine practice it will benefit the public health agenda | <b>Agree</b>                      | 238 | 68.6 | 24 | 66.7 | 127 | 74.7 | 61 | 59.2 | 26 | 68.4 |
|                                  |                                                                                                                                            | <b>Somewhat agree</b>             | 48  | 13.8 | 3  | 8.3  | 16  | 9.4  | 25 | 24.3 | 4  | 10.5 |
|                                  |                                                                                                                                            | <b>Neither agree nor disagree</b> | 19  | 5.5  | 2  | 5.6  | 8   | 4.7  | 6  | 5.8  | 3  | 7.9  |
|                                  |                                                                                                                                            | <b>Somewhat disagree</b>          | 4   | 1.2  | 1  | 2.8  |     |      | 1  | 1.0  | 2  | 5.3  |
|                                  |                                                                                                                                            | <b>Disagree</b>                   | 2   | 0.6  |    |      |     |      | 1  | 1.0  | 1  | 2.6  |
|                                  |                                                                                                                                            | <b>Not stated</b>                 | 36  | 10.4 | 6  | 16.7 | 19  | 11.2 | 9  | 8.7  | 2  | 5.3  |

\*  $\chi^2(3, N=308)=10.3, p < 0.05$

\*\*  $\chi^2(3, N=310)=11.9, p < 0.05$

\*\*\*  $\chi^2(3, N=310)=18.6, p < 0.001$
